# Supplementary material for: Neuron-Like Cells Generated from Human Umbilical Cord Lining-Derived Mesenchymal Stem Cells as a New In Vitro Model for Neuronal Toxicity Screening: Using Magnetite Nanoparticles as an Example
Source: Int J Mol Sci. 2019 Dec 31;21(1):271. doi: 10.3390/ijms21010271 (PMC6982086; doi:10.3390/ijms21010271)
Supplement: Supplementary file 1 [file ijms-21-00271-s001.pdf]

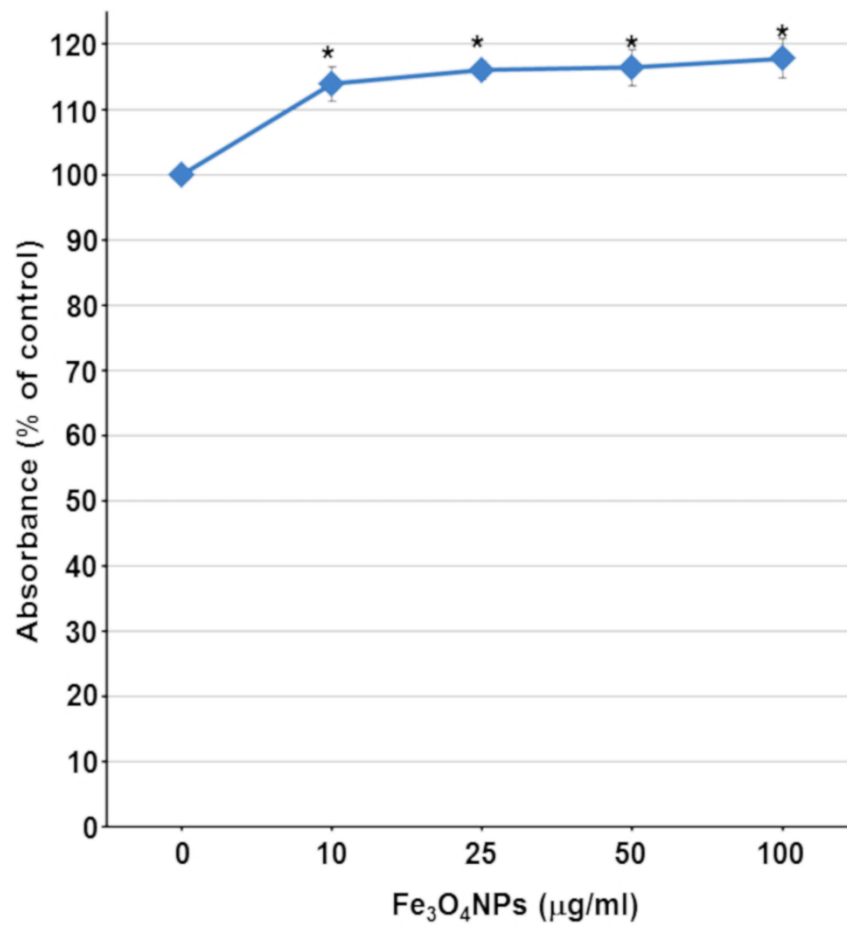

**Figure S1.** Optical properties of Fe<sub>3</sub>O<sub>4</sub>NPs alone in mesenchymal stem cell neurogenic differentiation medium evaluated at the same wavelength ( $\lambda = 550$  nm) of MTT assay. Data are expressed as the absorbance (% of control) and as mean  $\pm$  S.D. \* $p < 0.05$ .
